# Supplementary material
Source: publisher figshare collection journal article supplement (https://sage.figshare.com/ndownloader/files/23727625)
Supplement: Supplementary file 1 [file 23727625]

## **Supplementary**

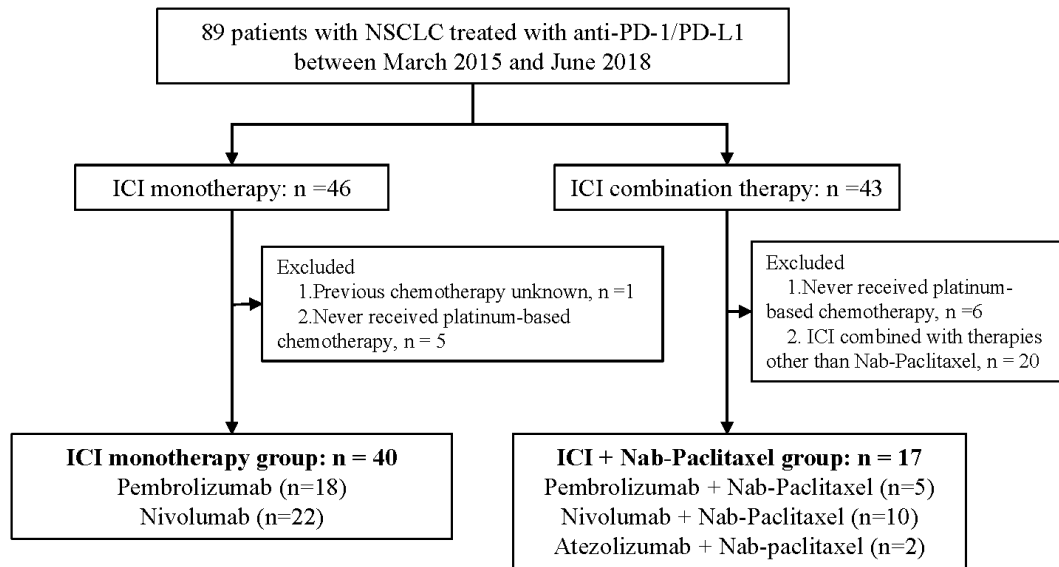

**Figure S1. Diagram of the study.**

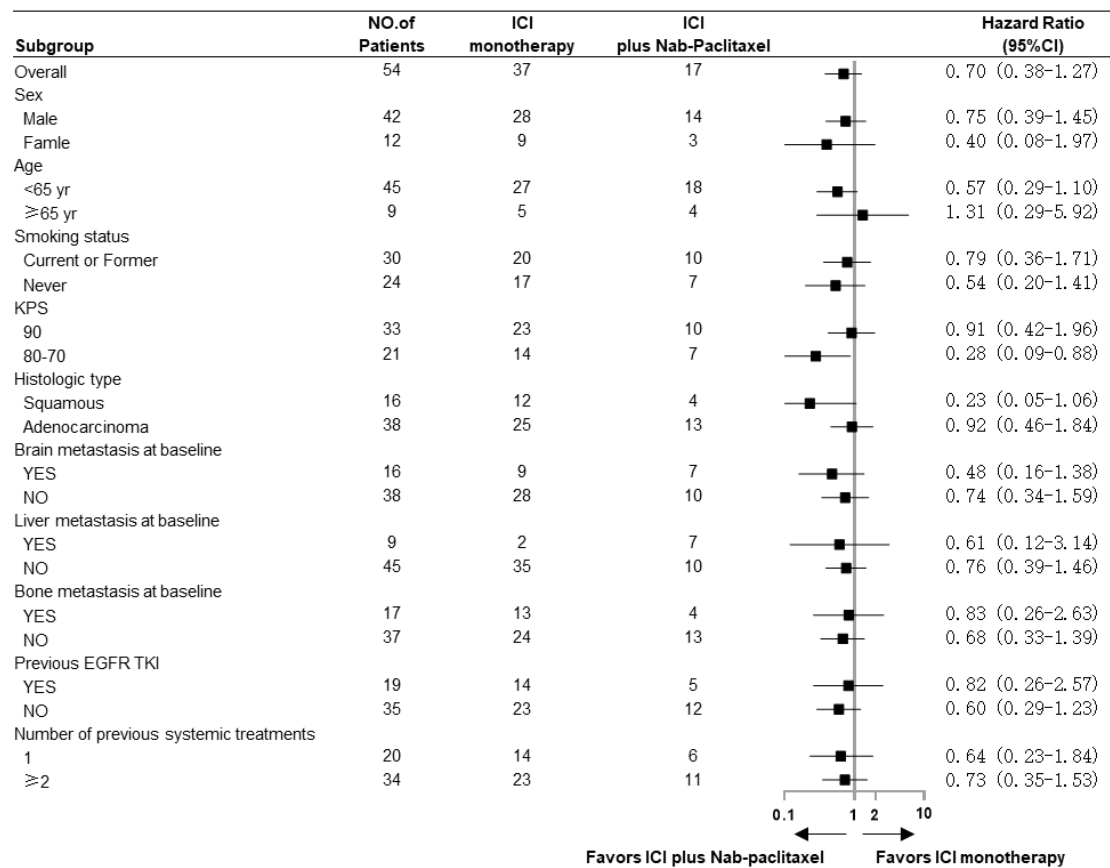

**Figure S2. Subgroup analyses of progression-free survival.** Subgroup analysis were presented from a Cox proportional-hazards model.

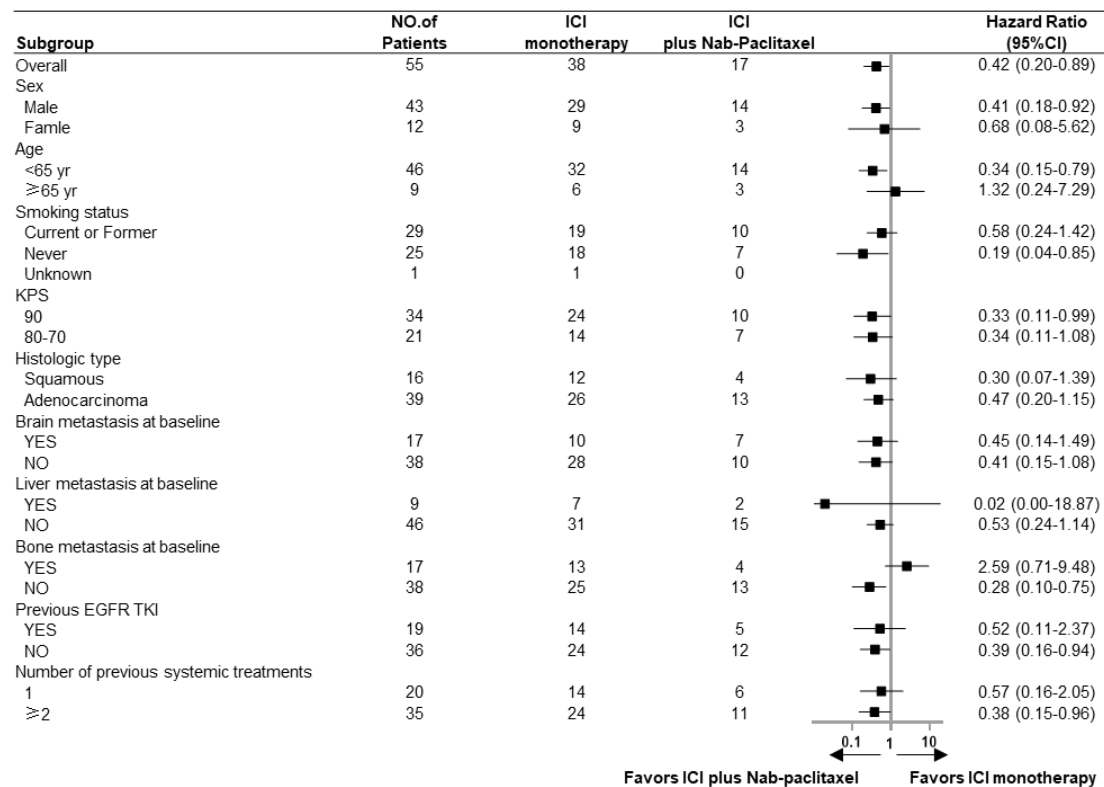

**Figure S3. Subgroup analyses of overall survival.** Subgroup analysis were presented from a Cox proportional-hazards model.

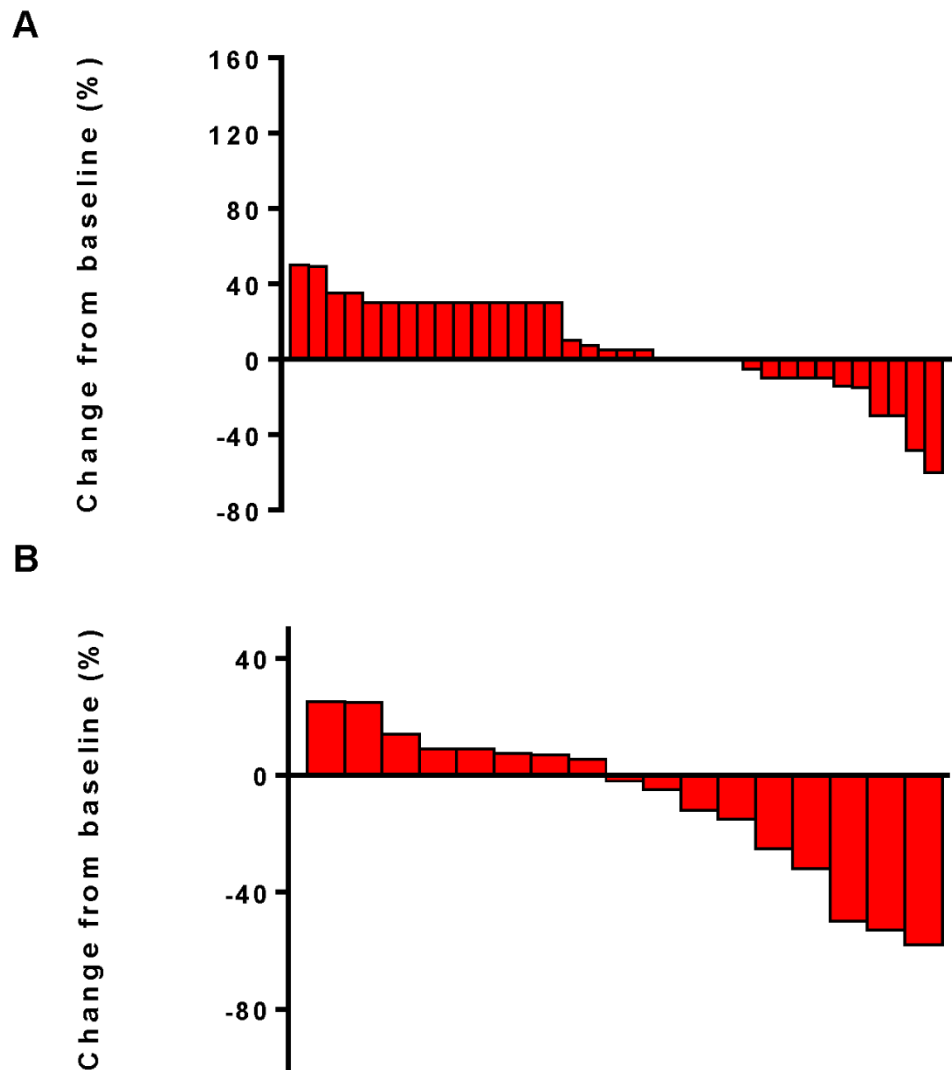

**Figure S4. Waterfall plots of best percentage change.** (A) The best percentage change from baseline in tumor size for patients who received anti-PD-1/PD-L1 monotherapy. (B) The best percentage change from baseline in tumor size for patients who received anti-PD-1/PD-L1 plus nab-paclitaxel.
